# Supplementary material for: Application of isomorphic anion incorporation to enhance electrochemical performance of vanadium-based NASICON cathode materials
Source: Royal Society of Chemistry journal article supplement (doi:10.1039/d5qi00906e), 2025-01-01
Supplement: d5qi00906e1.pdf [file d5qi00906e1.pdf]

## Support information

### Application of isomorphic Anion Substitution to Enhance Electrochemical Performance in Vanadium-Based NASICON Cathode Materials

Kang Tang<sup>a</sup>, Yanjun Cai<sup>a</sup>, Hualing Tian<sup>a</sup>, Yanhui Zhang<sup>a</sup>, Yingbo Wang<sup>a</sup>,  
He Ren<sup>a</sup>, Mofan Zhu<sup>a</sup>, Xiang Yao<sup>a\*</sup>, Juan Ding<sup>b\*</sup>, Zhi Su<sup>a,b\*</sup>

<sup>a</sup> College of Chemistry and Chemical Engineering, Xinjiang Key Laboratory of Energy Storage and  
Photoelectrolytic Materials, Xinjiang Normal University, Urumqi 830054, Xinjiang, P. R. China. E-mail:  
yaoxiangxjnu@163.com, suzhixj@163.com.

<sup>b</sup> State Key Laboratory of Chemistry and Utilization of Carbon Based Energy Resources, College of Chemistry,  
Xinjiang University, Urumqi 830017, Xinjiang, P. R. China. E-mail: dingjuan@xju.edu.cn.

---

Corresponding authors at: a College of Chemistry and Chemical Engineering, Xinjiang Key Laboratory of Energy Storage and Photoelectrolytic  
Materials, Xinjiang Normal University, Urumqi 830054, Xinjiang, P. R. China.(X. Yao) , P.R. China (Z. Su).

b State Key Laboratory of Chemistry and Utilization of Carbon Based Energy Resources, College of Chemistry, Xinjiang University, Urumqi 830017,  
Xinjiang, P.R. China. (J. Ding)

E-mail addresses: yaoxiangxjnu@163.com (X. Yao), dingjuan@xju.edu.cn(J. Ding), suzhixj@163.com (Z. Su).

## Experimental section

### Material synthesis

The  $\text{NaV}(\text{PO}_4)_{1-x}\text{F}(\text{SiO}_4)_x$  ( $x=0.05, 0.1, 0.15$ ) was synthesized via the sol-gel method followed by high-temperature calcination. Add 3 mmol of  $\text{V}_2\text{O}_5$  and 1.5g of  $\text{H}_2\text{C}_2\text{O}_4 \cdot 2\text{H}_2\text{O}$  were added to the beaker and stirred at  $70^\circ\text{C}$  for 1 h. The mixture was then supplemented with 6 mmol NaF,  $6(1-x)$  mmol  $\text{NH}_4\text{H}_2\text{PO}_4$ , and a specific quantity of  $(\text{C}_2\text{H}_5\text{O})_4\text{Si}$ , followed by stirring for 5 h to yield a dark green gel. Subsequently, the gel was subjected to drying at  $90^\circ\text{C}$  for 12 h. The precursor was heat-treated in a tube furnace at  $350^\circ\text{C}$  in an argon atmosphere for 4 h, then the temperature was raised to  $750^\circ\text{C}$  for calcination for 8 h to obtain the target product  $\text{NaV}(\text{PO}_4)_{1-x}\text{F}(\text{SiO}_4)_x$  ( $x=0.05, 0.1, 0.15$ ). The preparation process of NVPF/C samples was the same as above, without adding  $(\text{C}_2\text{H}_5\text{O})_4\text{Si}$ .

### Material characterization

The crystal structure of the sample was characterized using X-ray diffraction (XRD, Cu K $\alpha$  radiation, Bruker D2). The composition of functional groups in the samples was identified through Fourier transform infrared spectroscopy (FTIR, NICOLET iS50). The bandgap of the material was investigated via ultraviolet-visible diffuse reflectance spectroscopy (UV 3600I plus). Electronic conductivity of the material was evaluated using the four-point probe technique. The microstructure of the sample was analyzed by scanning electron microscopy (SEM, Thermo Scientific Apreo 2C) and high-resolution transmission electron microscopy (HR-TEM, Talos F200S G2). The oxidation states and elemental compositions were examined using X-ray photoelectron spectroscopy (XPS, Thermo Scientific K-Alpha X).

### Electrochemical measurement

The active electrode was prepared by mixing the active material, acetylene black, and polyvinylidene fluoride in an 8:1:1 mass ratio with N-methyl pyrrolidone as a solvent. After thorough grinding and homogeneous mixing, the resultant slurry was uniformly deposited onto an aluminum foil substrate. Subsequently, the aluminum foil was transferred to a vacuum drying oven set at  $80^\circ\text{C}$  for 12 h. After complete drying, the foil was precision-cut into circular electrodes with a diameter of 12 mm, ensuring an active material loading of approximately  $2.0\text{ mg/cm}^2$ . The CR2032

half-battery was assembled in a glove box under high-purity argon, and tested using GCD on the LAND system (CT210A). CV and EIS measurements were performed using a CHI760E workstation. For the full battery, hard carbon served as the anode and NVPF-SiO<sub>10</sub> as the cathode. Hard carbon was obtained by cycling a sodium-based half-battery three times at 30  $\mu\text{A g}^{-1}$ .

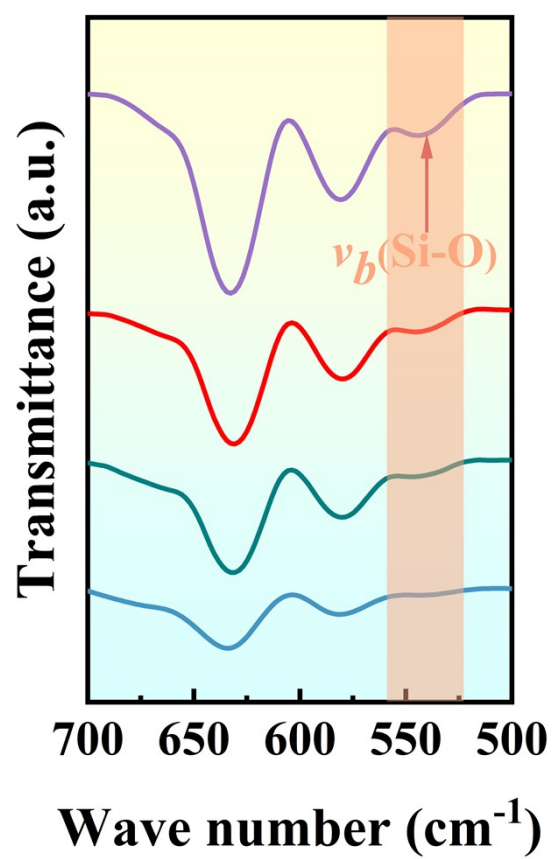

Figure S1. the FTIR local magnification of NVPF-SiO<sub>x</sub>;

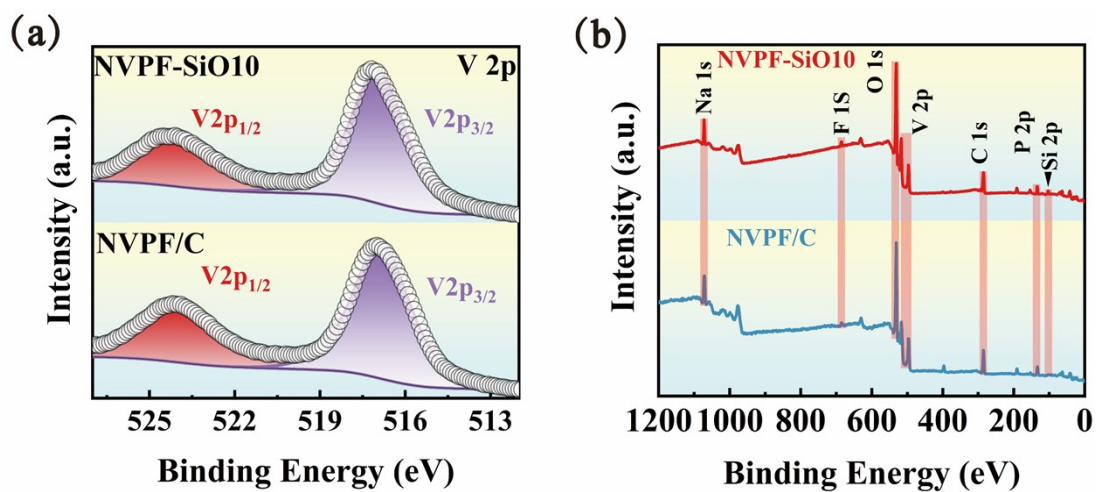

Figure S2. XPS spectra of NVPF/C and NVPF-SiO10 (a) V 2p, (b) full spectrum.

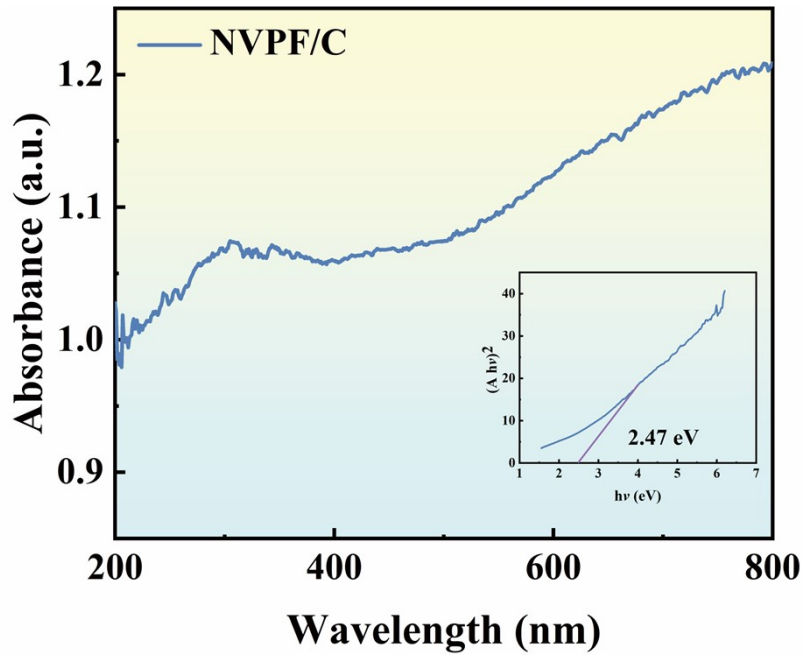

Figure S3. Uv-vis diffuse reflection spectra of NVPF/C materials

$$(\alpha h\nu)^{1/2} = B(h\nu - E_g) \quad (S1-1)$$

In the Kubelka-Munk formula,  $D$  denotes the absorbance,  $h$  represents the Planck constant, and  $\nu$  signifies the frequency of light.  $B$  is a physical quantity associated with material properties, while  $E_g$  indicates the bandgap energy of the material.

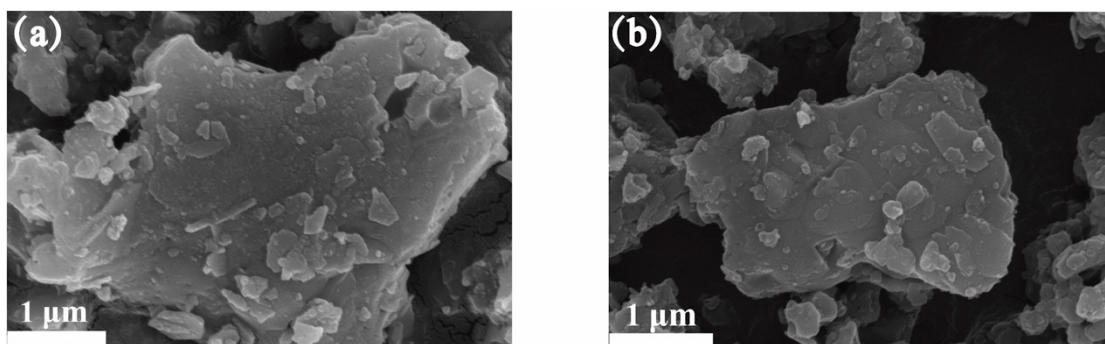

Figure S4. SEM images for (a) NVPF and (b) NVPF-SiO10

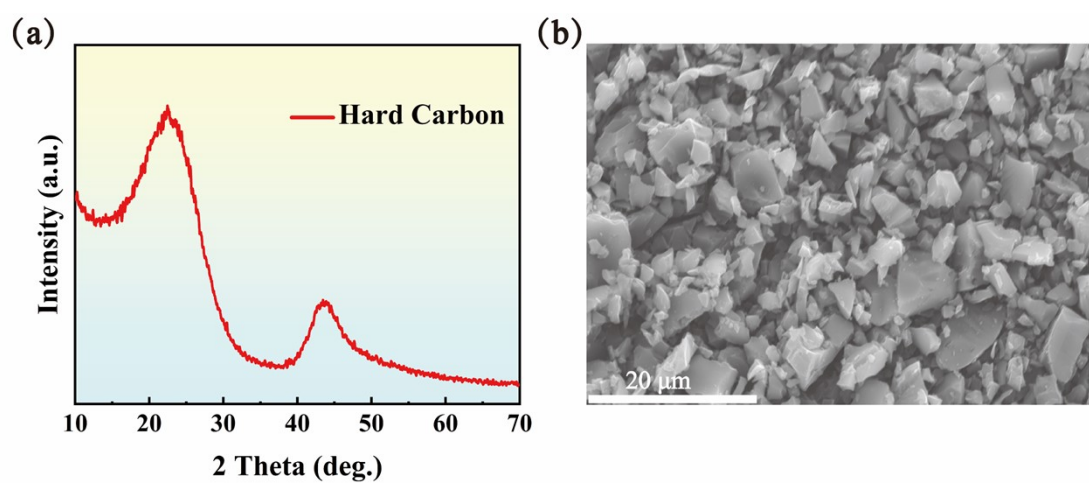

Figure S5. (a) XRD and (b) SEM of hard carbon



**Table S1 Comparison of full battery electrochemical performance with recent literature results.**

| References | Rate (C)                                 |       |       |       |       |      |      |      |
|------------|------------------------------------------|-------|-------|-------|-------|------|------|------|
|            | Specific capacity (mAh g <sup>-1</sup> ) |       |       |       |       |      |      |      |
| 1          | 1                                        | 2     | 5     | 10    | 20    |      |      |      |
|            | 97                                       | 95    | 93    | 88    | 68    |      |      |      |
| 2          | 0.1                                      | 0.2   | 0.5   | 1     | 2     | 5    | 10   | 20   |
|            | 130                                      | 125   | 122   | 116   | 110   | 100  | 70   | 80   |
| 3          | 0.1                                      | 0.5   | 2     | 10    | 20    |      |      |      |
|            | 96.6                                     | 95.4  | 89.4  | 80.5  | 70.3  |      |      |      |
| 4          | 0.1                                      | 0.2   | 0.5   | 1     | 2     | 5    | 10   |      |
|            | 89.4                                     | 82.4  | 72.1  | 61.7  | 51    | 37.8 | 29.6 |      |
| 5          | 0.05                                     | 0.1   | 0.2   | 0.5   |       |      |      |      |
|            | 120                                      | 104   | 90    | 65    |       |      |      |      |
| 6          | 0.1                                      | 0.2   | 0.5   | 1     | 2     | 5    | 10   |      |
|            | 116                                      | 107   | 105   | 103   | 98    | 85   | 60   |      |
| 7          | 0.05                                     | 0.1   | 0.2   | 0.5   | 1     | 2    | 5    | 10   |
|            | 113                                      | 103   | 90    | 87    | 76    | 70   | 68   | 65.8 |
| 8          | 0.1                                      | 0.2   | 0.5   | 1     | 2     | 5    | 10   |      |
|            | 122                                      | 115   | 110   | 105   | 103   | 96   | 86   |      |
| This work  | 0.5                                      | 1     | 3     | 5     | 10    | 20   | 30   |      |
|            | 120.3                                    | 116.6 | 112.2 | 109.6 | 103.9 | 94.6 | 89.3 |      |

1、Ge, X.; Li, X.; Wang, Z.; Guo, H.; Yan, G.; Wu, X.; Wang, J., Facile synthesis of NaVPO<sub>4</sub>F/C cathode with enhanced interfacial conductivity towards long-cycle and high-rate sodium-ion batteries. *Chemical Engineering Journal* 2019, 357, 458-462.

2、Law, M.; Balaya, P., NaVPO<sub>4</sub>F with high cycling stability as a promising cathode for sodium-ion battery. *Energy Storage Materials* 2018, 10, 102-113.

3、Zhao, C.; Guo, J.; Gu, Z.; Zhao, X.; Li, W.; Yang, X.; Liang, H.; Wu, X., Robust three-dimensional carbon conductive network in a NaVPO<sub>4</sub>F

cathode used for superior high-rate and ultralong-lifespan sodium-ion full batteries. *Journal of Materials Chemistry A* 2020, 8, 17454-17462.

4 、 Wang, Y.; Bin, D.; Wang, C.; Cao, Y.; Xia, Y., Carbon-Coated NaVPO<sub>4</sub>F as a High-Capacity Cathode for Aqueous Sodium-Ion Battery. *Batteries & Supercaps* 2023, 6, e202300275.

5 、 Ruan, Y.; Wang, K.; Song, S.; Han, X.; Cheng, B., Graphene modified sodium vanadium fluorophosphate as a high voltage cathode material for sodium ion batteries. *Electrochimica Acta* 2015, 160, 330-336.

6 、 Kumar, V. K.; Ghosh, S.; Biswas, S.; Martha, S. K., Pitch-Derived Soft-Carbon-Wrapped NaVPO<sub>4</sub>F Composite as a Potential Cathode Material for Sodium-Ion Batteries. *ACS Applied Energy Materials* 2021, 4, 4059-4069.

7 、 Guo, J.; Yang, A.; Zhao, X.; Gu, Z.; Wu, X., 3D Carbon Networks Constructed NaVPO<sub>4</sub>F/C/rGO as a Cathode Material for High-Performance Sodium-Ion Batteries. *Frontiers in Energy Research* 2020, 8.

8 、 Kumar, V. K.; Ghosh, S.; Naresh, V.; Ummethala, G.; Malladi, S. R. K.; Martha, S. K., Binder and conductive diluents free NaVPO<sub>4</sub>F based free-standing positive electrodes for sodium-ion batteries. *Journal of The Electrochemical Society* 2022, 169, 10512.
